# Supplementary material for: The fine-scale genetic structure and evolution of the Japanese population
Source: PubMed Central journal article supplement (PMC5665431; doi:10.1371/journal.pone.0185487), 2017-11-01

Figure S2

Comparison of the current study with the Japanese populations in the BioBank Japan study. Individuals in the current study were classified by the principal components computed for the BioBank Japan populations by using the software by Kumasaka et al. [J. Hum. Genet. 55:525]. **a)** The two studies completely agreed on the classification between Hondo clusters and Ryukyu clusters. **b)** Distribution of BioBank Japan individuals according to the first two principal components are plotted as gray clouds of points. **c)** Individuals in the current study are overlaid as colored points.

**a**

| Japanese clusters in this study |                  | Assigned geographical regions according to PCA of BioBank Japan study |       |       |        |         |
|---------------------------------|------------------|-----------------------------------------------------------------------|-------|-------|--------|---------|
|                                 |                  | Hondo                                                                 |       |       |        | Ryukyu  |
|                                 |                  | Tohoku                                                                | Kanto | Kinki | Kyushu | Okinawa |
| Hondo                           | Midland (n=840)  | 2                                                                     | 730   | 108   | 0      | 0       |
|                                 | Fukuoka (n=198)  | 0                                                                     | 156   | 39    | 3      | 0       |
|                                 | Ehime (n=158)    | 0                                                                     | 123   | 35    | 0      | 0       |
|                                 | Shimane 1 (n=77) | 0                                                                     | 77    | 0     | 0      | 0       |
|                                 | Shimane 2 (n=82) | 0                                                                     | 81    | 1     | 0      | 0       |
| Ryukyu                          | Ryukyu 1 (n=116) | 0                                                                     | 0     | 0     | 0      | 116     |
|                                 | Ryukyu 2 (n=42)  | 0                                                                     | 0     | 0     | 0      | 42      |
|                                 | Ryukyu 3 (n=13)  | 0                                                                     | 0     | 0     | 0      | 13      |
|                                 | Ryukyu 4 (n=13)  | 0                                                                     | 0     | 0     | 0      | 13      |

**b**

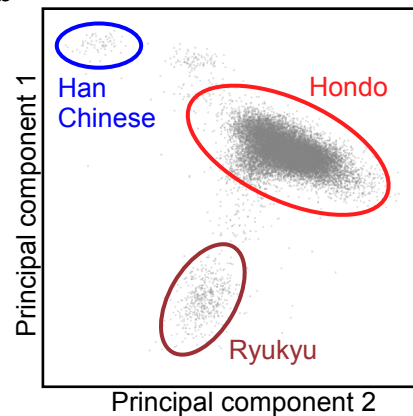

**c**

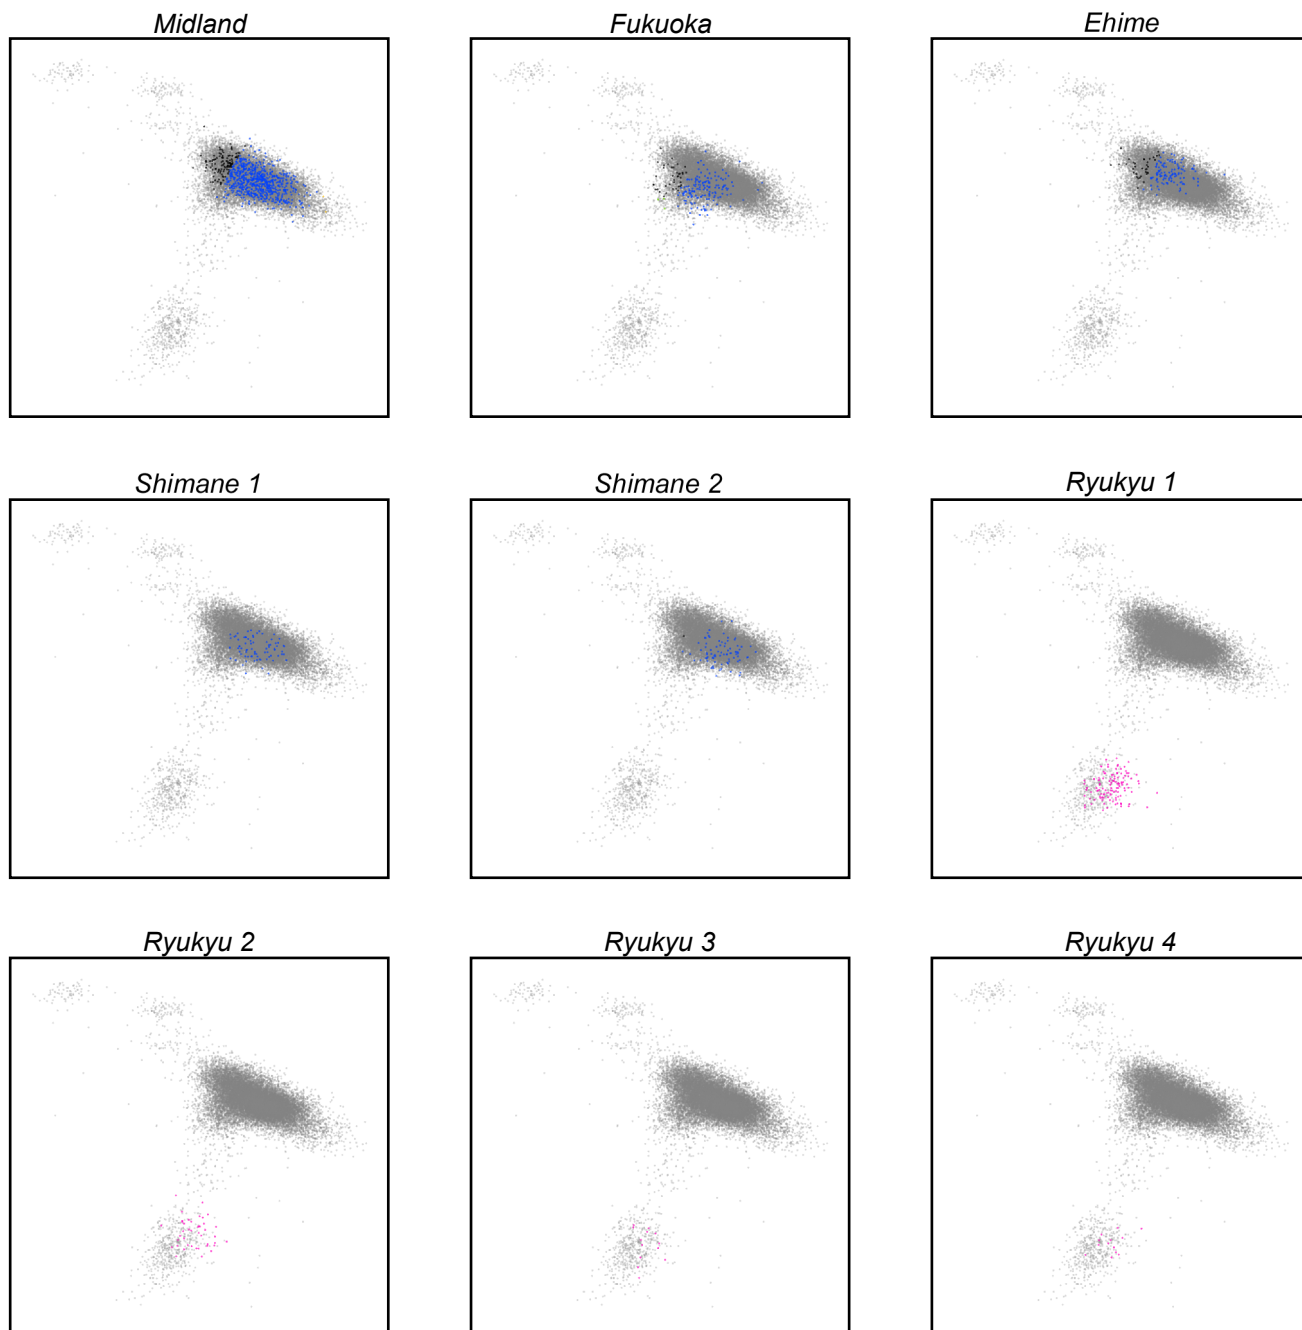

Supplement: pone.0185487.s002.pdf [file pone.0185487.s002.pdf]
