# Supplementary material for: The fine-scale genetic structure and evolution of the Japanese population
Source: PubMed Central journal article supplement (PMC5665431; doi:10.1371/journal.pone.0185487), 2017-11-01
Supplement: pone.0185487.s001.pdf [file pone.0185487.s001.pdf]

Figure S1

EIGENSOFT analysis of Japanese populations. Individuals are plotted by the first two principal components. Nine clusters with 10 or more individuals, which are defined by the fineSTRUCTURE method, are highlighted by different colors. In the EIGENSOFT analysis, the Okinawa people as a whole are separated from the others (Hondo people), while the four Ryukyu clusters (*Ryukyu 1-4*) in the Okinawa people tend to overlap and are indistinguishable to each other. The clusters of Hondo people separate neither by the third to tenth principal components.

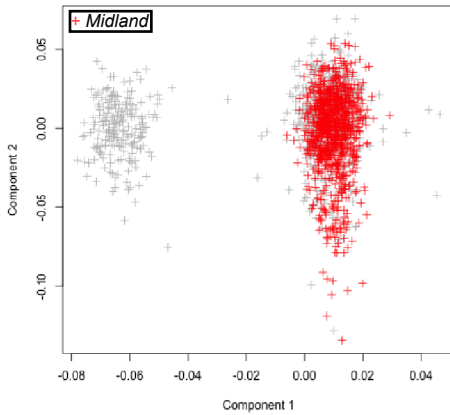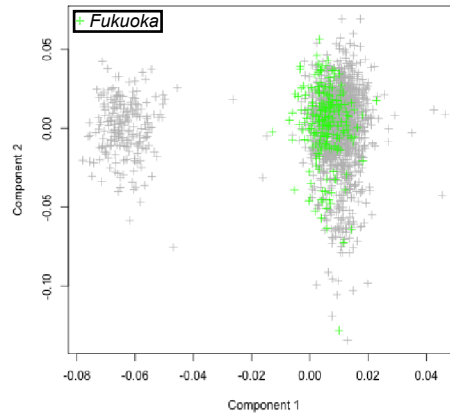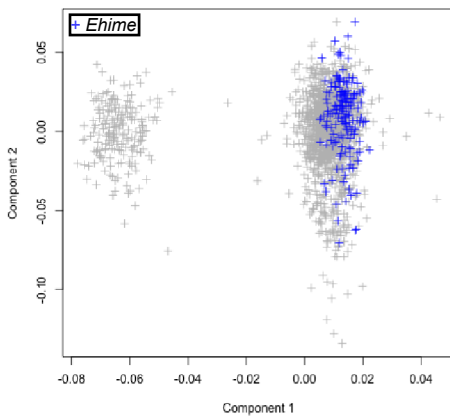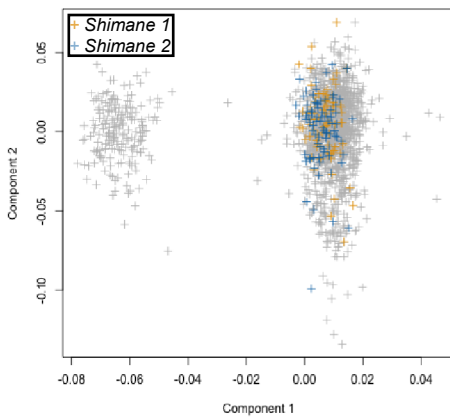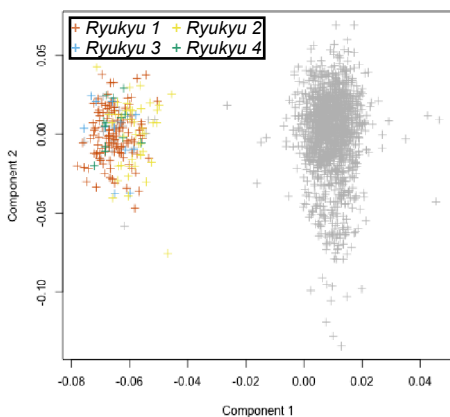

A. Distribution of principal component values in each genetic cluster.

| Genetic cluster         | Component 1 |        | Component 2 |        |
|-------------------------|-------------|--------|-------------|--------|
|                         | Mean        | SD     | Mean        | SD     |
| <i>Midland</i> (n=840)  | 0.0099      | 0.0048 | -0.0026     | 0.0267 |
| <i>Fukuoka</i> (n=197)  | 0.0054      | 0.0051 | 0.0019      | 0.0248 |
| <i>Ehime</i> (n=158)    | 0.0133      | 0.0035 | 0.0083      | 0.0239 |
| <i>Shimane 1</i> (n=77) | 0.0072      | 0.0042 | 0.0053      | 0.0231 |
| <i>Shimane 2</i> (n=82) | 0.0058      | 0.0042 | 0.0009      | 0.0229 |
| <i>Ryukyu 1</i> (n=116) | -0.0652     | 0.0054 | -0.0007     | 0.0167 |
| <i>Ryukyu 2</i> (n=42)  | -0.0583     | 0.0055 | -0.0011     | 0.0230 |
| <i>Ryukyu 3</i> (n=13)  | -0.0652     | 0.0057 | 0.0010      | 0.0200 |
| <i>Ryukyu 4</i> (n=13)  | -0.0656     | 0.0044 | 0.0057      | 0.0147 |

B. Statistical significance for difference in average principal component values between Hondo clusters (ANOVA P-value).

| Pair of genetic clusters             | Component 1 | Component 2 |
|--------------------------------------|-------------|-------------|
| <i>Midland</i> vs <i>Fukuoka</i>     | 8.7E-30     | 0.031       |
| <i>Midland</i> vs <i>Ehime</i>       | 5.6E-17     | 1.7E-06     |
| <i>Midland</i> vs <i>Shimane 1</i>   | 1.6E-06     | 0.012       |
| <i>Midland</i> vs <i>Shimane 2</i>   | 1.7E-13     | 0.25        |
| <i>Fukuoka</i> vs <i>Ehime</i>       | 2.4E-46     | 0.014       |
| <i>Fukuoka</i> vs <i>Shimane 1</i>   | 7.3E-03     | 0.29        |
| <i>Fukuoka</i> vs <i>Shimane 2</i>   | 0.55        | 0.76        |
| <i>Ehime</i> vs <i>Shimane 1</i>     | 2.7E-25     | 0.36        |
| <i>Ehime</i> vs <i>Shimane 2</i>     | 2.8E-35     | 0.0214      |
| <i>Shimane 1</i> vs <i>Shimane 2</i> | 0.040       | 0.23        |

C. Statistical significance for difference in average principal component values between Ryukyu clusters (ANOVA P-value).

| Pair of genetic clusters           | Component 1 | Component 2 |
|------------------------------------|-------------|-------------|
| <i>Ryukyu 1</i> vs <i>Ryukyu 2</i> | 6.6E-11     | 0.89        |
| <i>Ryukyu 1</i> vs <i>Ryukyu 3</i> | 0.97        | 0.73        |
| <i>Ryukyu 1</i> vs <i>Ryukyu 4</i> | 0.80        | 0.19        |
| <i>Ryukyu 2</i> vs <i>Ryukyu 3</i> | 3.1E-04     | 0.76        |
| <i>Ryukyu 2</i> vs <i>Ryukyu 4</i> | 6.5E-05     | 0.32        |
| <i>Ryukyu 3</i> vs <i>Ryukyu 4</i> | 0.82        | 0.51        |
