# Supplementary material for: The fine-scale genetic structure and evolution of the Japanese population
Source: PubMed Central journal article supplement (PMC5665431; doi:10.1371/journal.pone.0185487), 2017-11-01

Figure S3

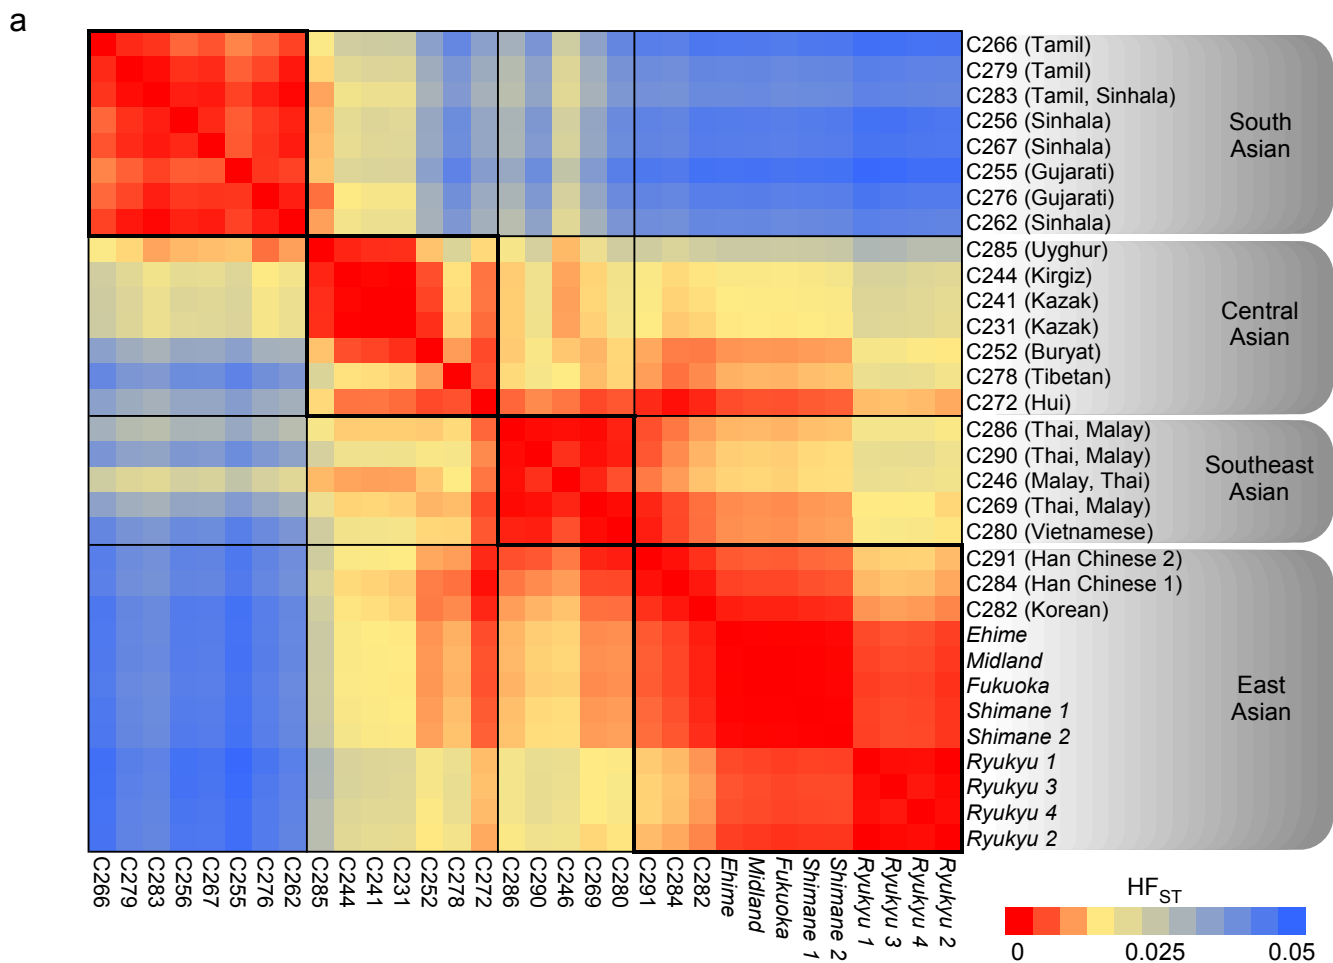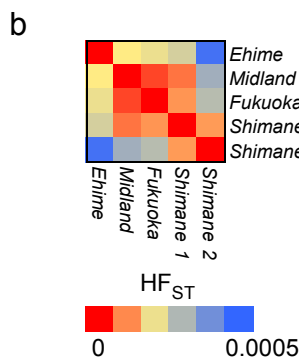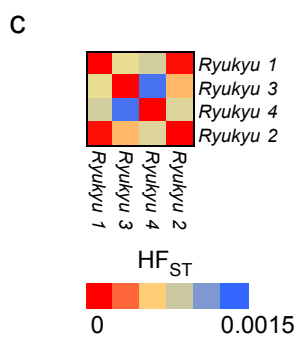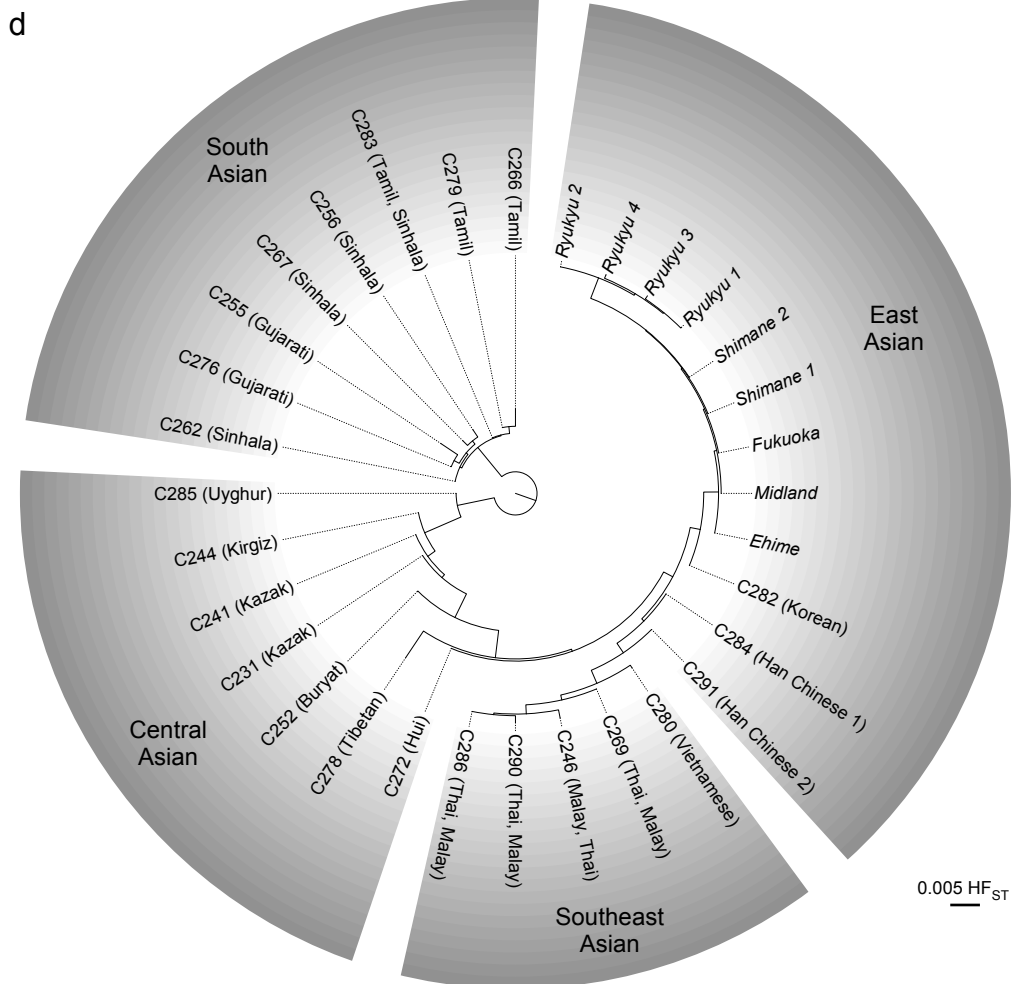

Supplement: pone.0185487.s003.pdf [file pone.0185487.s003.pdf]
