# Supplementary material for: The fine-scale genetic structure and evolution of the Japanese population
Source: PubMed Central journal article supplement (PMC5665431; doi:10.1371/journal.pone.0185487), 2017-11-01

Figure S4

Comparison of admixture time among Japanese clusters. The admixture time was estimated using the 1-reference ALDER test (Table 1). The squares and whiskers represent the estimate and SE of the admixture time for single clusters. A diamond represents the meta-analysis of a group of clusters; the center and width of the diamond indicate the combined estimate and SE. The decimal beside the diamond is the  $P$ -value for heterogeneity of admixture times among the clusters. There was no heterogeneity among the clusters in Hondo or among the clusters in Ryukyu ( $P_{\text{het}} > 0.05$ ). However, when all Japanese clusters were combined, there was significant heterogeneity in admixture time ( $P_{\text{het}} < 0.05$  when the reference population is C284 or C291).

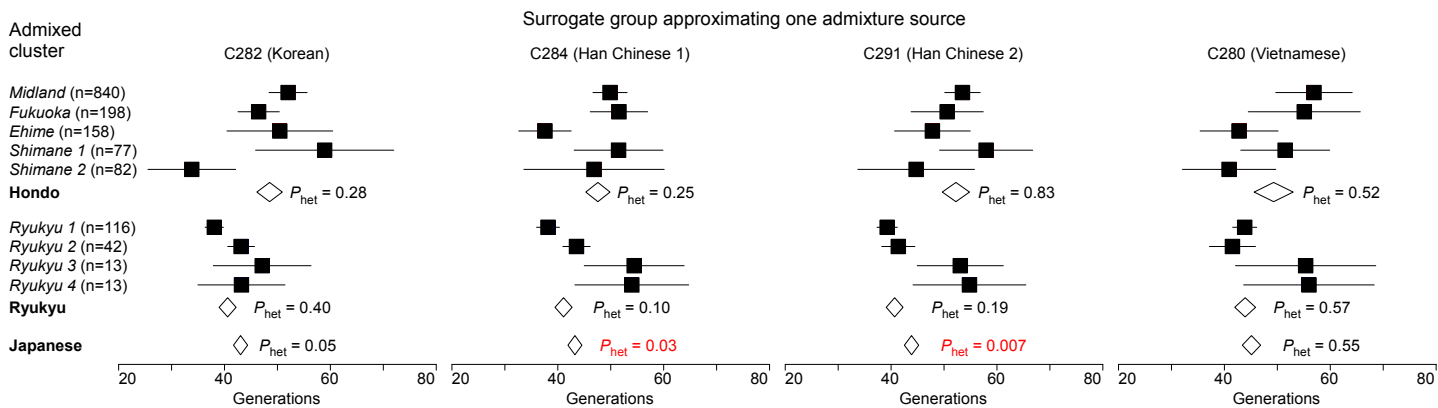

Supplement: pone.0185487.s004.pdf [file pone.0185487.s004.pdf]
