# Supplementary material for: The fine-scale genetic structure and evolution of the Japanese population
Source: PubMed Central journal article supplement (PMC5665431; doi:10.1371/journal.pone.0185487), 2017-11-01

Figure S6

Correlations of  $HF_{ST}$  ranking among the four East Asian areas are shown in the left table. For the 4-SNPs windows at top 5% of  $HF_{ST}$  in area A1, the distribution of  $HF_{ST}$  values in the other three areas are shown in the right plot.

|    |  | Rank correlation of $HF_{ST}$ |                        |                         |
|----|--|-------------------------------|------------------------|-------------------------|
|    |  | A2                            | A3                     | A4                      |
| A1 |  | 0.0391<br>( $P=1.9e-10$ )     | 0.0075<br>( $P=0.22$ ) | -0.0064<br>( $P=0.29$ ) |
| A2 |  |                               | 0.0062<br>( $P=0.31$ ) | 0.0022<br>( $P=0.71$ )  |
| A3 |  |                               |                        | 0.0013<br>( $P=0.029$ ) |

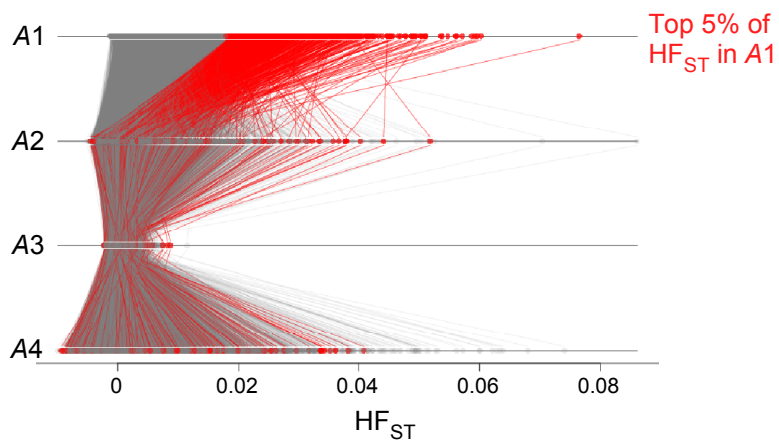

Supplement: pone.0185487.s006.pdf [file pone.0185487.s006.pdf]
