# Supplementary material for: The fine-scale genetic structure and evolution of the Japanese population
Source: PubMed Central journal article supplement (PMC5665431; doi:10.1371/journal.pone.0185487), 2017-11-01

Figure S7

Schematic representation of datasets used in the study. The figure maps were generated using the packages maps v2.3-9 and mapdata v2.2-3 in the R software.

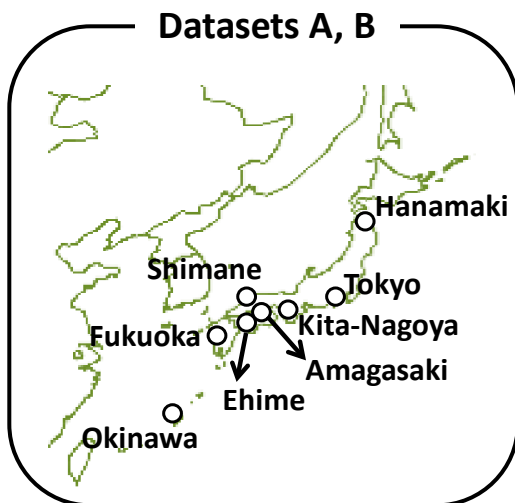

Dataset B includes an extended set of 428 individuals from the Shimane prefecture.

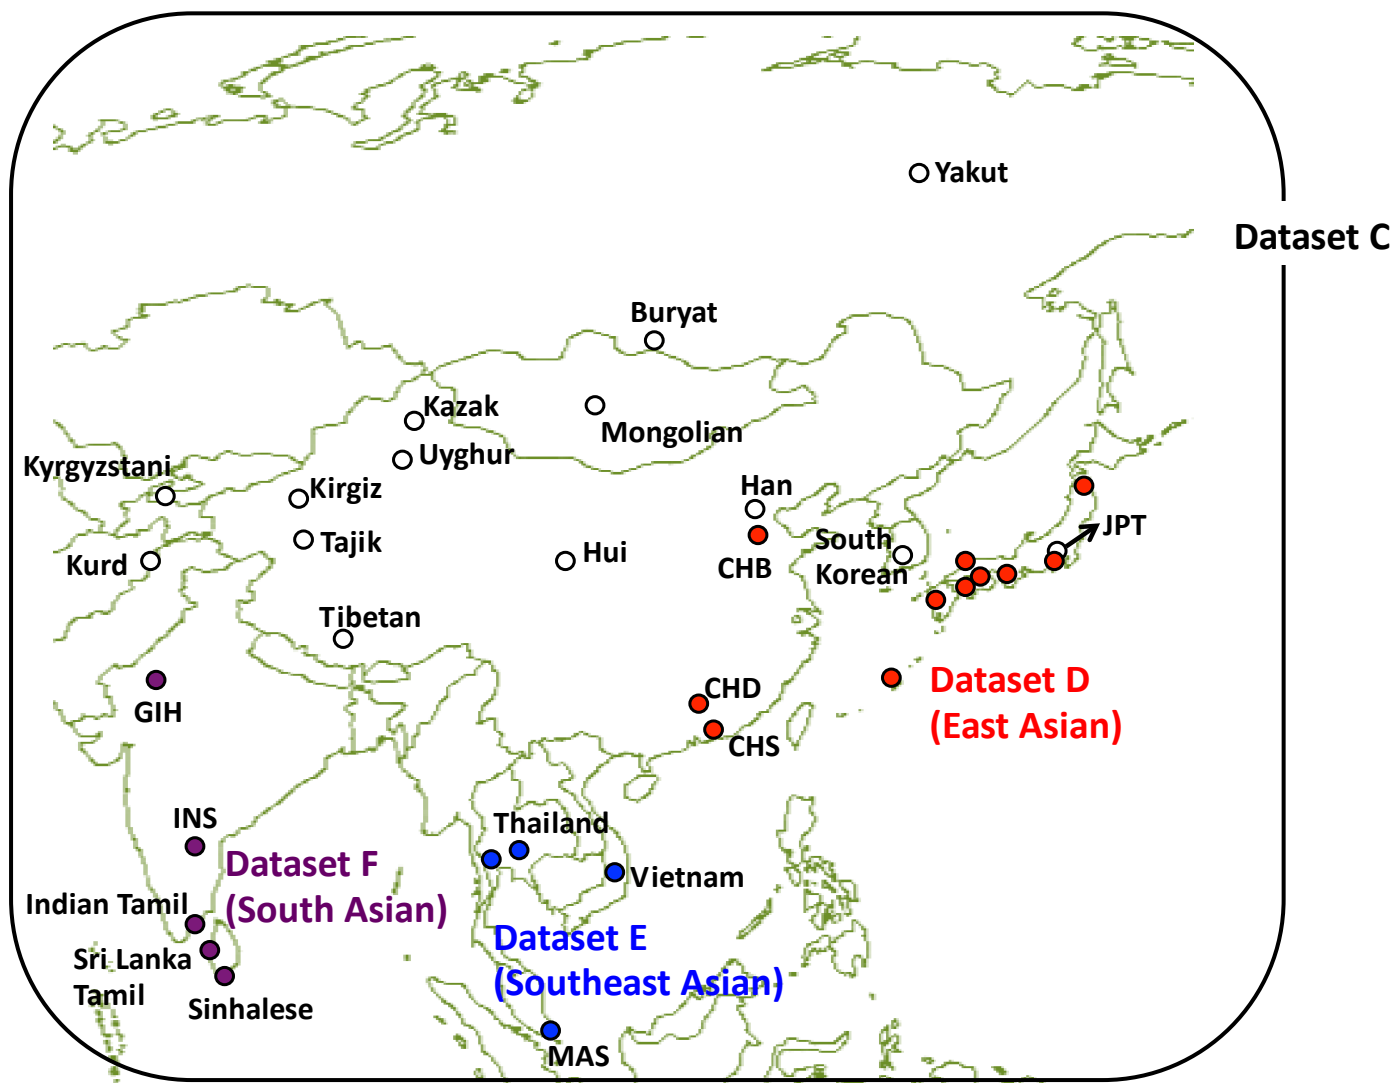

Supplement: pone.0185487.s007.pdf [file pone.0185487.s007.pdf]
